# Supplementary material for: Enhancing high-voltage solid-state lithium-metal battery performance through a stable solid-electrolyte interphase
Source: Royal Society of Chemistry journal article supplement (doi:10.1039/d4ta02701a), 2024-01-01
Supplement: d4ta02701a1.pdf [file d4ta02701a1.pdf]

## *Supporting information*

# **Enhancing high-voltage solid-state lithium-metal battery performance through stable solid-electrolyte interphase**

Ander Orue, \*<sup>a</sup> Mikel Arrese-Igor,<sup>a</sup> Uxue Gonzalez,<sup>a</sup> Nuria Gomez,<sup>a</sup> Rosalía Cid,<sup>a</sup> Pedro López-Aranguren<sup>a</sup>

Center for Cooperative Research on Alternative Energies (CIC energiGUNE), Basque Research and Technology Alliance (BRTA), Parque Tecnológico de Álava, Albert Einstein, 48, 01510, Vitoria-Gasteiz, Spain

\**Corresponding author:* Center for Cooperative Research on Alternative Energies (CIC energiGUNE), Basque Research and Technology Alliance (BRTA), Parque Tecnológico de Álava, Albert Einstein, 48, 01510, Vitoria-Gasteiz, Spain. *Email address:* [aorue@cicenergigune.com](mailto:aorue@cicenergigune.com) (A. Orue)

## **Table of Contents**

### **1. Supplementary Figures**

### **2. Supplementary Tables**

## 1. Supplementary Figures

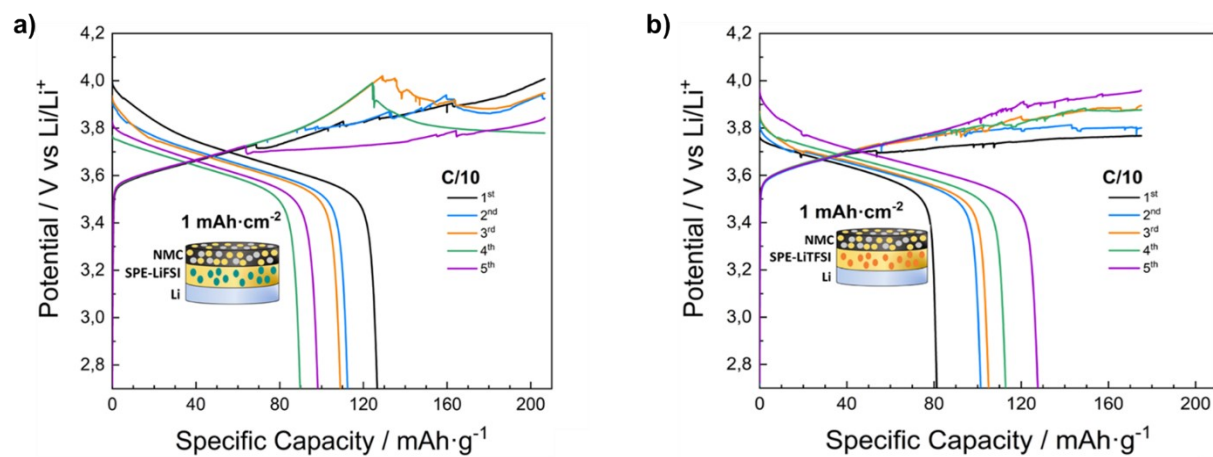

**Fig. S1.** Long cycling performance at 0.1C and RT of NMC622-based full cells assembled with (a) SPE-LiFSI and (b) SPE-LITFSI as SPE.

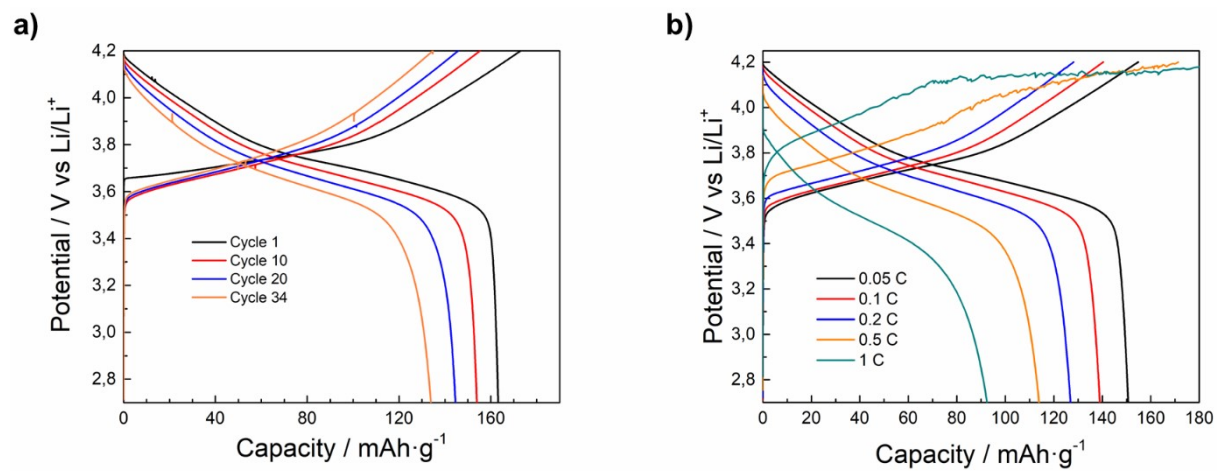

**Fig. S2.** (a) Voltage galvanostatic profiles at 0.1C and (b) voltage galvanostatic profiles at different current rates of NMC622|SPE-LiBOB|Li metal cells with 1 mAh·cm<sup>-2</sup> loading.

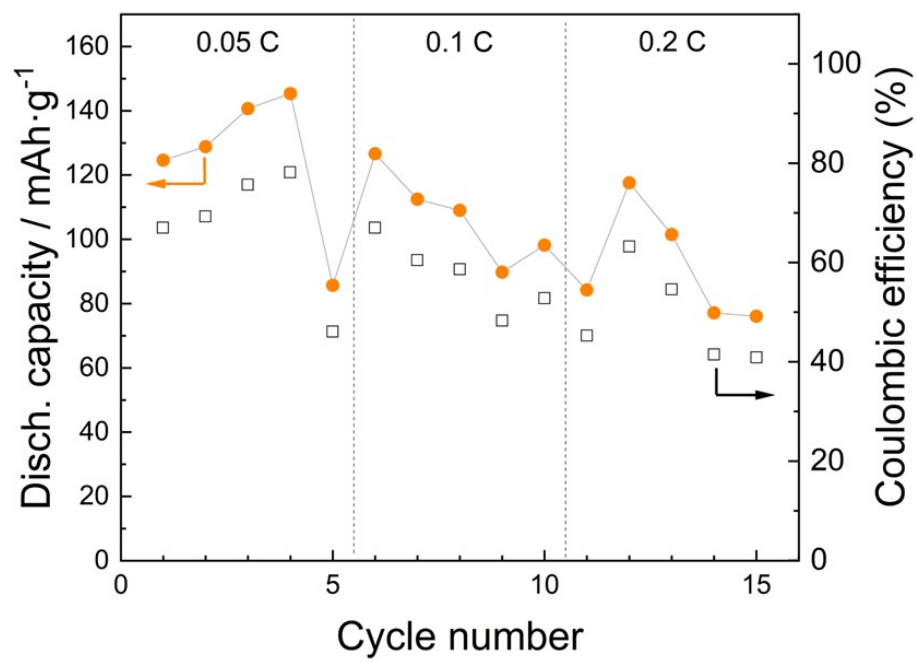

**Fig. S3.** C-rate capability test of NMC622|SPE-LiFSI|Li metal cell at 70 °C for a cathode loading of 1 mAh·cm<sup>-2</sup>.

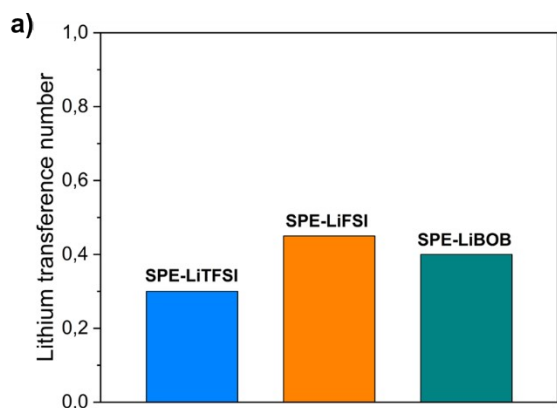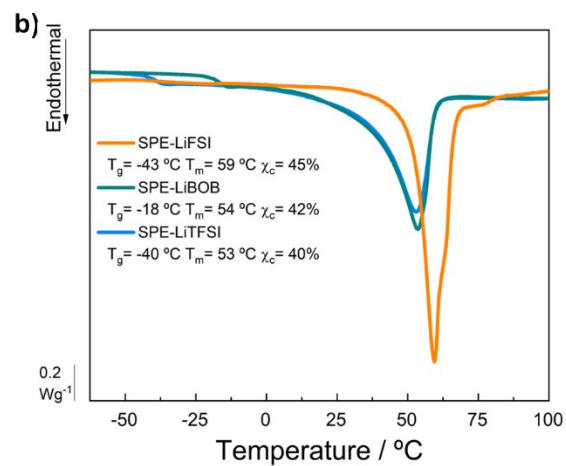

**Fig. S4.** (A) Lithium transference number and (b) DSC thermograms of Li-based containing SPE.

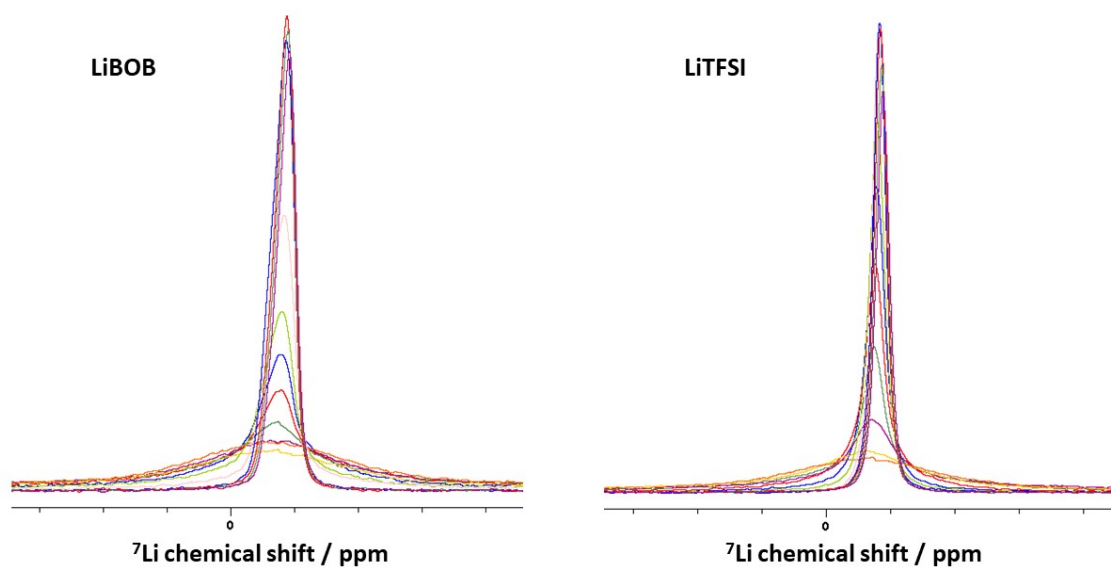

**Fig. S5.**  ${}^7\text{Li}$  signals at different temperature for SPE-LiBOB (left) and SPE-LiTFSI (right)

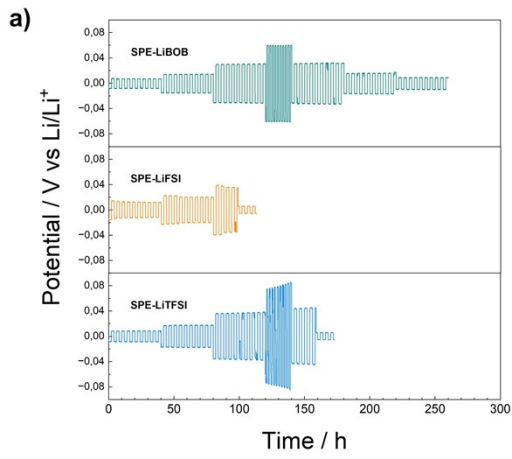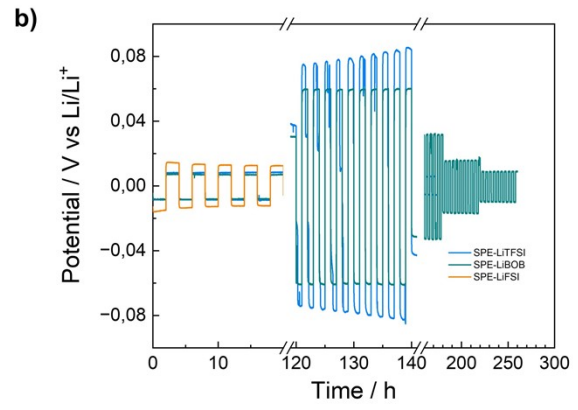

**Fig**

. S6. (a) C-rate capability of symmetric lithium cells assembled with different SPE and (b) inset of C-rate capability test.

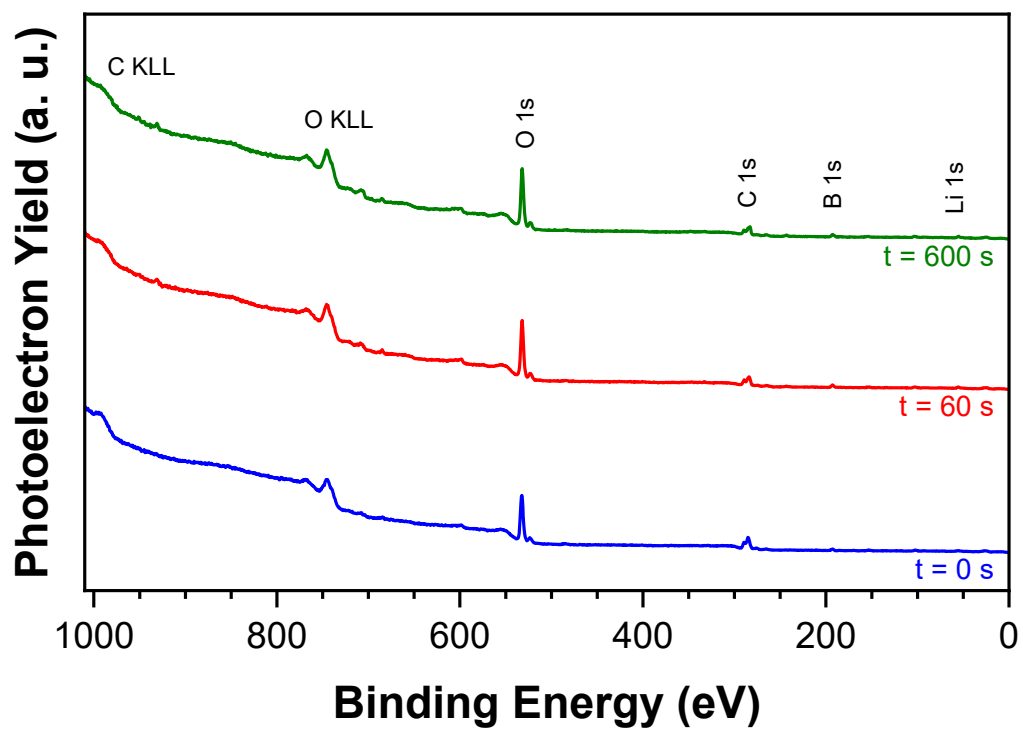

Fig. S7. Survey scan spectra of the Li deposits using LiBOB salt at different sputtering times.



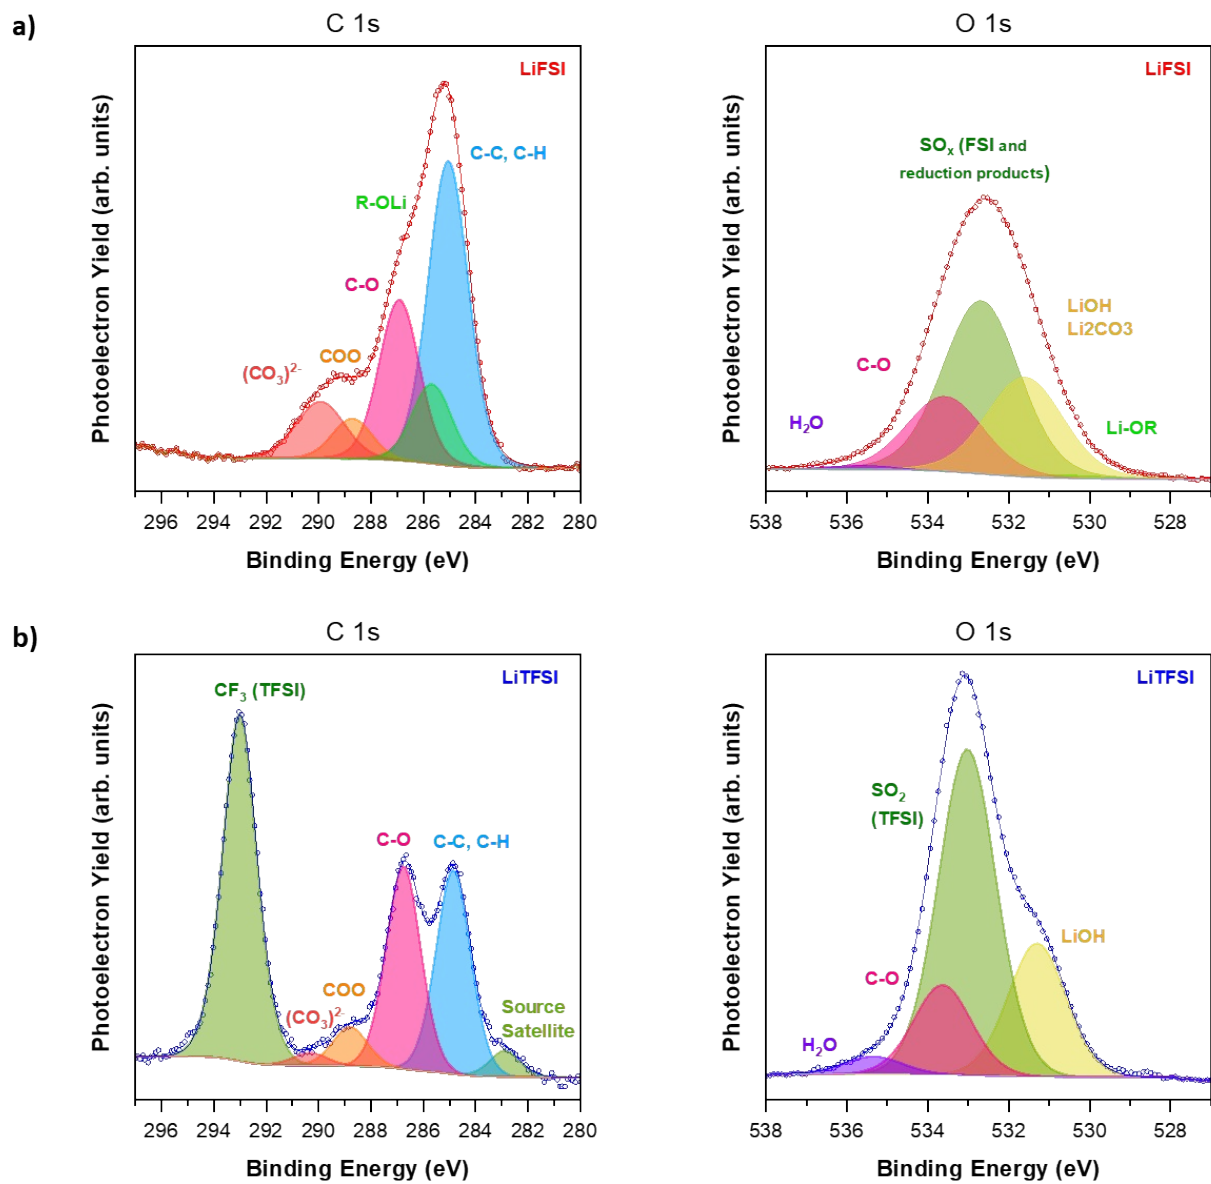

**Fig. S8.** C 1s and O 1s spectra of the outermost surface of SEI formed on plated Li metal with (a) LiFSI and (b) LiTFSI containing electrolyte

## 2. Supplementary Tables

**Table S1.** Estimated resistances and capacitances of the different elements after being fitted to the EC model.

| Sample         | $R_b$<br>(Ohm) | $CPE_{int}$<br>( $F \cdot s^{(a-1)}$ ) | $R_{int}$<br>(Ohm) | $CPE_{ct}$<br>( $F \cdot s^{(a-1)}$ ) | $R_{ct}$<br>(Ohm) | $W_s$<br>( $Ohm \cdot s^{-1/2}$ ) |
|----------------|----------------|----------------------------------------|--------------------|---------------------------------------|-------------------|-----------------------------------|
| Before cycling | 14.5           | $6.71 \times 10^{-6}$                  | 19.0               | ---                                   | ---               | 17.5                              |
| At 80% DoD     | 17.3           | $1.81 \times 10^{-5}$                  | 22.3               | $1.65 \times 10^{-5}$                 | 27.2              | 99.9                              |

**Table S2.** Activation energy (Ea) and ionic conductivity ( $\sigma$ ) of SPEs with different Li-based salts.

| Sample     | $\sigma_{25^\circ C} \times 10^6$<br>( $S \cdot cm^{-1}$ ) | Ea1<br>(eV) | $\sigma_{70^\circ C} \times 10^4$<br>( $S \cdot cm^{-1}$ ) | Ea2<br>(eV) |
|------------|------------------------------------------------------------|-------------|------------------------------------------------------------|-------------|
| SPE-LiBOB  | 0.9                                                        | 1.8         | 3.7                                                        | 0.4         |
| SPE-LiTFSI | 6.5                                                        | 1.1         | 4.4                                                        | 0.3         |
| SPE-LiFSI  | 1.8                                                        | 1.2         | 2.0                                                        | 0.3         |
